# Supplementary material for: Telomere-to-telomere sequencing genome assembly identifies variants and genes associated with lactation and dwarf traits in Bactrian camel
Source: Research Square preprint supplement (doi:10.21203/rs.3.rs-7689121/v1), 2025-10-15
Supplement: Supplementary file 1 [file b50d78c935ab2554d37d050c.pdf]

Supplementary Table 8. Significant genes with camel milk production traits

| GENE     | CHROM | TRAITS                                  |
|----------|-------|-----------------------------------------|
| NPY2R    | 2     | Day_milk                                |
| RBM46    | 2     | Day_milk                                |
| CXXC4    | 2     | Day_milk, Morning_milk                  |
| GPRIN3   | 2     | Day_milk, Morning_milk                  |
| LIMCH1   | 2     | Day_milk, Morning_milk                  |
| NDST1    | 3     | Day_milk, Morning_milk                  |
| SYNPO    | 3     | Day_milk, Morning_milk                  |
| ACO1     | 4     | Day_milk, Morning_milk                  |
| SMIM27   | 4     | Day_milk, Morning_milk                  |
| PRRT1B   | 4     | Day_milk                                |
| GPR39    | 5     | Day_milk, Morning_milk                  |
| NCKAP5   | 5     | Day_milk, Morning_milk                  |
| ACSL3    | 5     | Day_milk, Morning_milk                  |
| TMC05A   | 6     | Day_milk, Morning_milk                  |
| GLI3     | 7     | Day_milk, Morning_milk                  |
| CHRM3    | 11    | Day_milk, Morning_milk                  |
| FARP1    | 14    | Day_milk, Morning_milk                  |
| RNF144A  | 15    | Day_milk, Morning_milk                  |
| CRK      | 16    | Day_milk, Morning_milk                  |
| YWHAE    | 16    | Day_milk                                |
| DOC2B    | 16    | Day_milk, Morning_milk                  |
| ITGA9    | 17    | Day_milk, Morning_milk                  |
| KHDRBS2  | 20    | Day_milk, Morning_milk                  |
| RUFY1    | 22    | Day_milk, Morning_milk                  |
| MIB1     | 24    | Day_milk, Morning_milk                  |
| RUNX1T1  | 25    | Day_milk, Morning_milk                  |
| PCSK6    | 27    | Day_milk, Morning_milk                  |
| TM2D3    | 27    | Day_milk, Morning_milk                  |
| RBMS1    | 5     | Ash, Protein                            |
| CACNA2D1 | 7     | Ash, Lactose, Non-fat, Protein          |
| SLC35F1  | 8     | Ash, Density, Lactose, Non-fat, Protein |
| INPP5D   | 5     | Density, Non-fat, Protein               |
| COL23A1  | 22    | Density                                 |
| CLK4     | 22    | Density                                 |
| TPH2     | 12    | Ash, Density, Lactose, Non-fat, Protein |
| PIANP    | 34    | Lactose                                 |
| HS6ST1   | 5     | Fat                                     |
| STXBP5   | 8     | Fat                                     |
| PRR5     | 12    | Fat                                     |
| MPP7     | 35    | Fat                                     |
| PDGFD    | 10    | Protein                                 |
| DYNC2H1  | 10    | Protein                                 |
