# Supplementary figures and images for: Telomere-to-telomere sequencing genome assembly identifies variants and genes associated with lactation and dwarf traits in Bactrian camel
Source: Research Square preprint supplement (doi:10.21203/rs.3.rs-7689121/v1), 2025-10-15

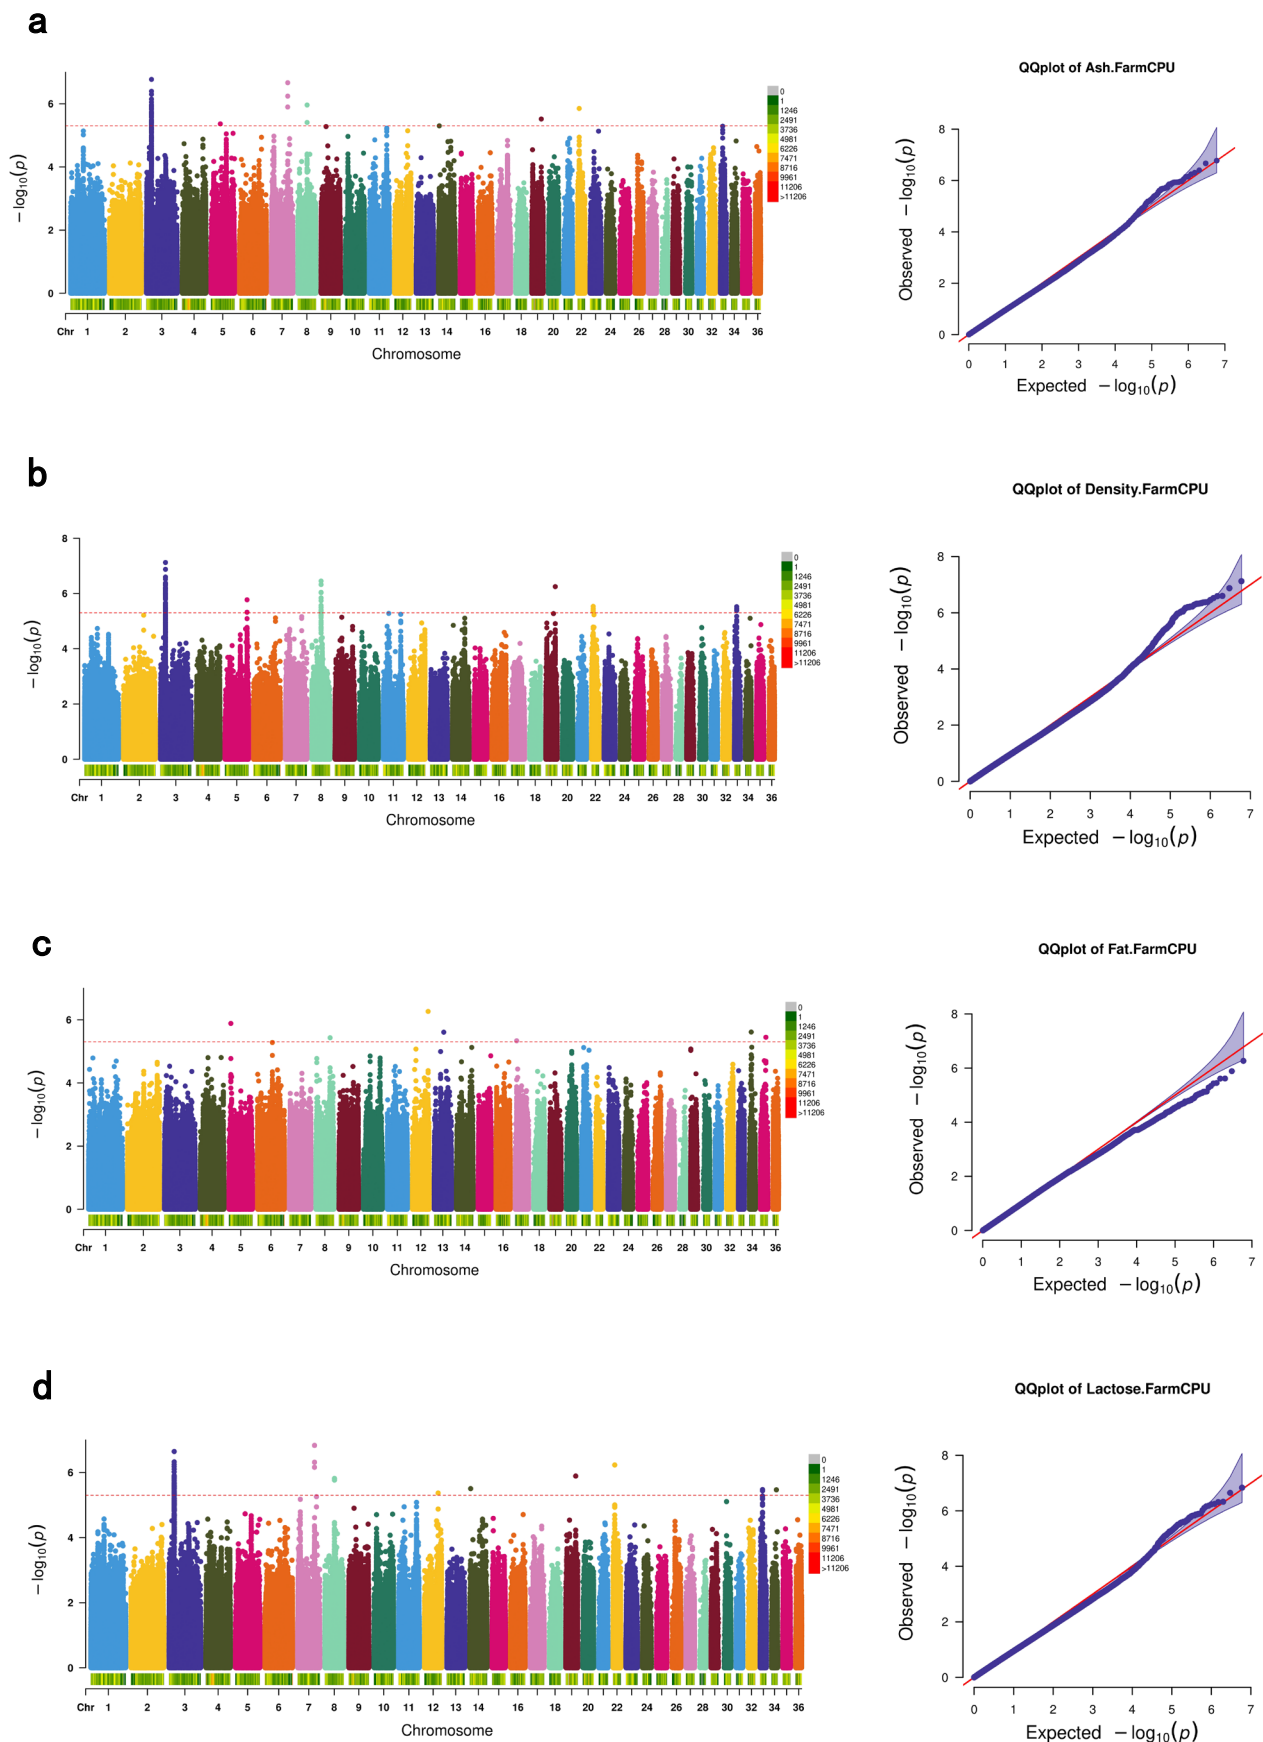

**e**

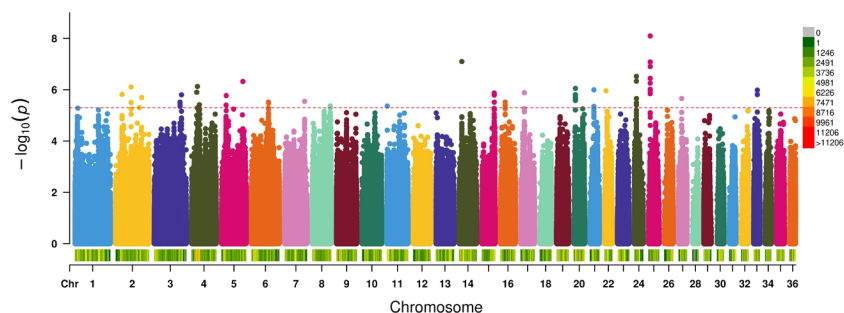

QQplot of Morning\_milk.FarmCPU

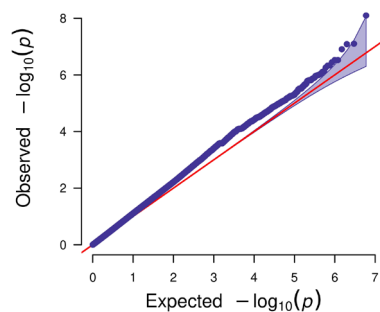

**f**

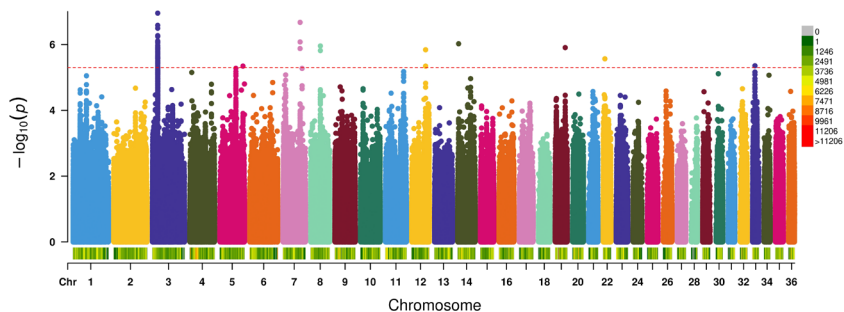

QQplot of Non\_fat.FarmCPU

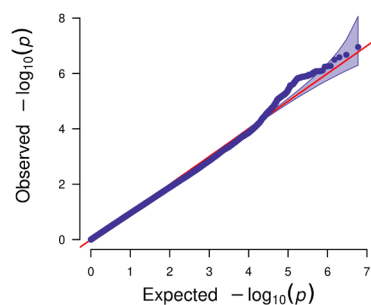

**g**

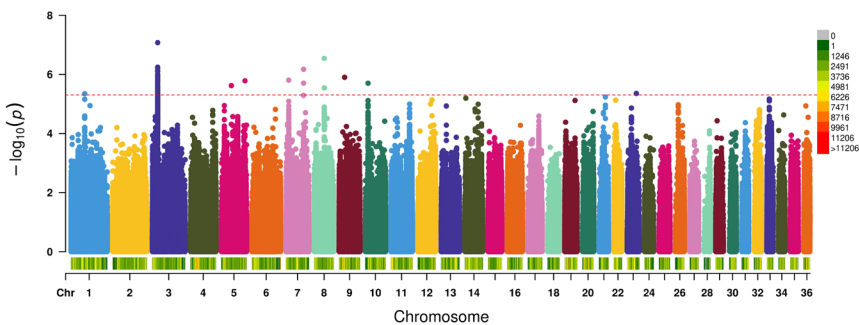

QQplot of Protein.FarmCPU

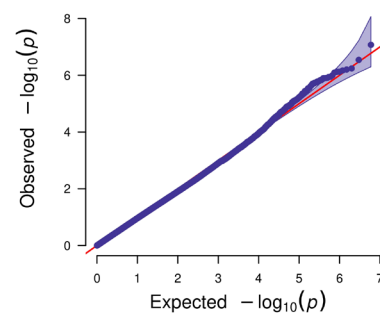

Supplement: Supplementary file 2 [file d835352191eed90e42cba315.pdf]
